# Supplementary material for: Therapeutic Effects of Conditioned Medium of Neural Differentiated Human Bone Marrow-Derived Stem Cells on Rotenone-Induced Alpha-Synuclein Aggregation and Apoptosis
Source: Hindawi journal article supplement (doi:10.1155/2021/6658271), 2021-01-22
Supplement: f1 [file 6658271.f1.pdf]

## Supplementary Materials for

### “Therapeutic Effects of Conditioned Medium of Neural Differentiated Human Bone Marrow-Derived Stem Cells on Rotenone-Induced alpha-Synuclein Aggregation and Apoptosis”

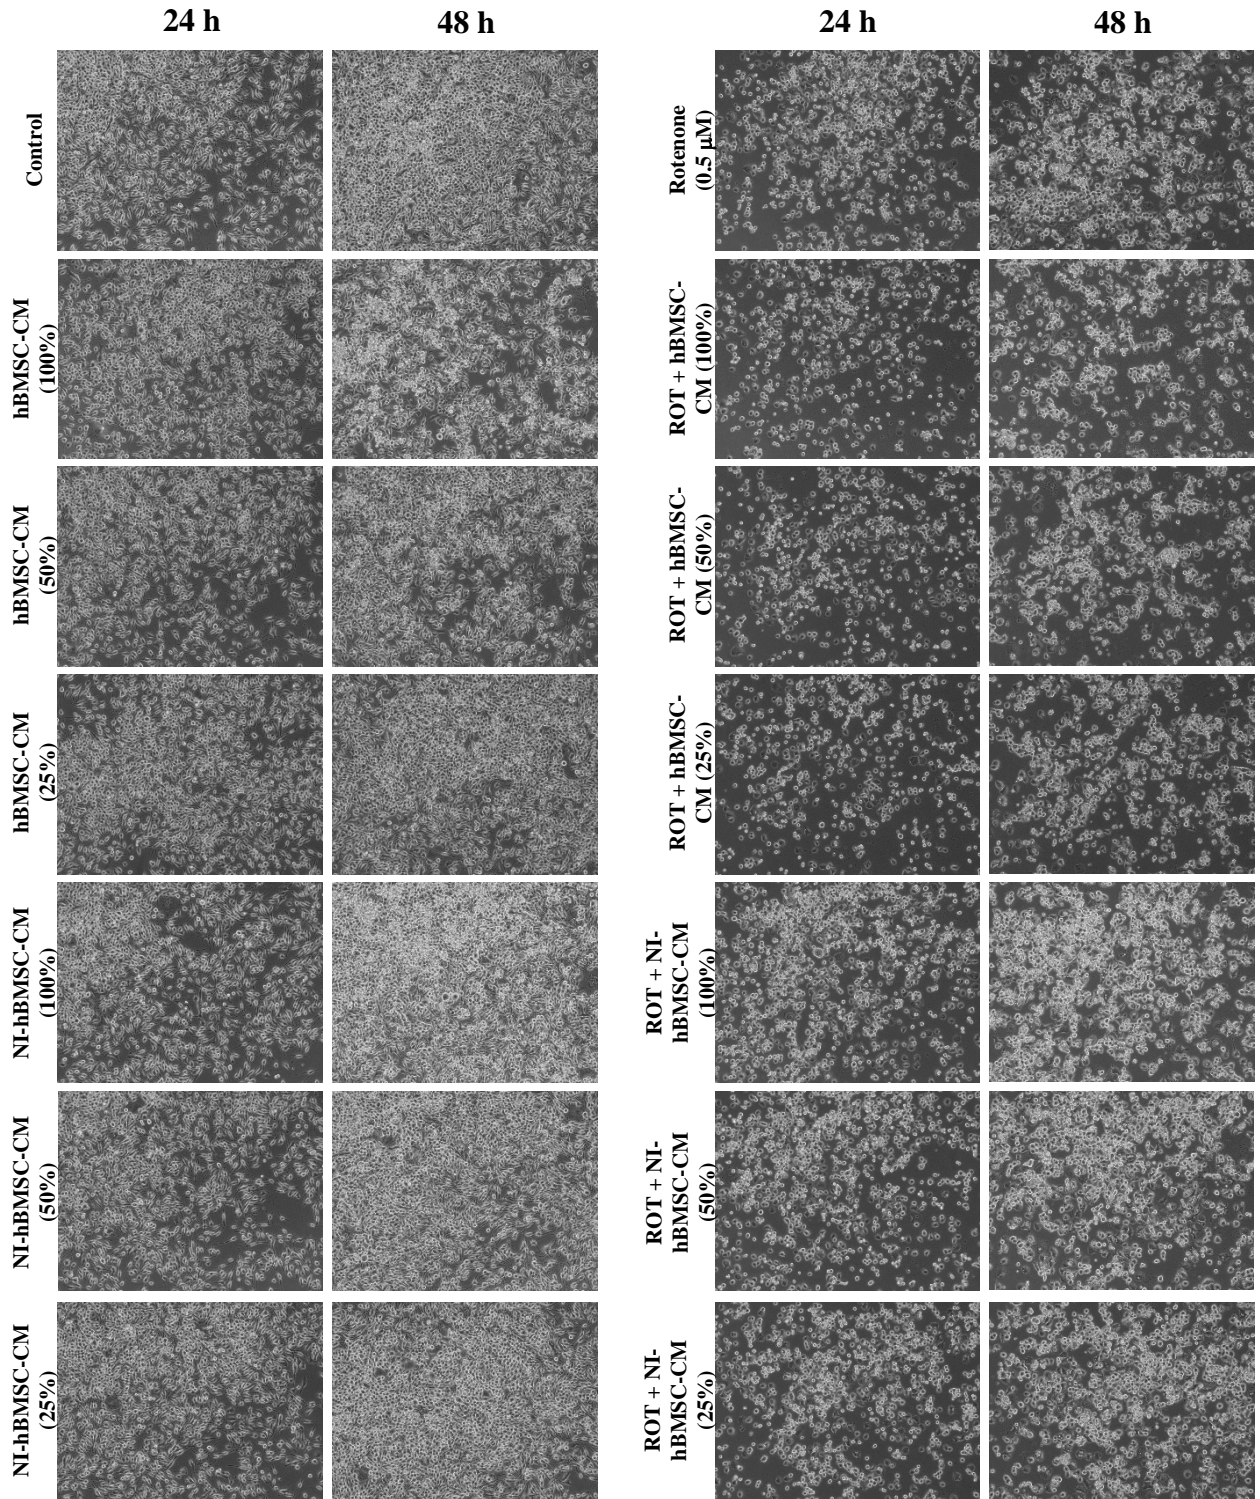

**SUPPLEMENTARY FIGURE 1:** SH-SY5Y cells were seeded as  $5 \times 10^4$  cells/ml of DMEM containing 1% FBS and used for experiments after overnight incubation. Cells incubated with the absence or presence of ROT (0.5  $\mu$ M) for 48 h were treated with hBMSC-CM or NI-hBMSC-CM at 100 or 50 or 25% during the last 24 h and assessed for morphological changes. Each picture is representative of three independent experiments.

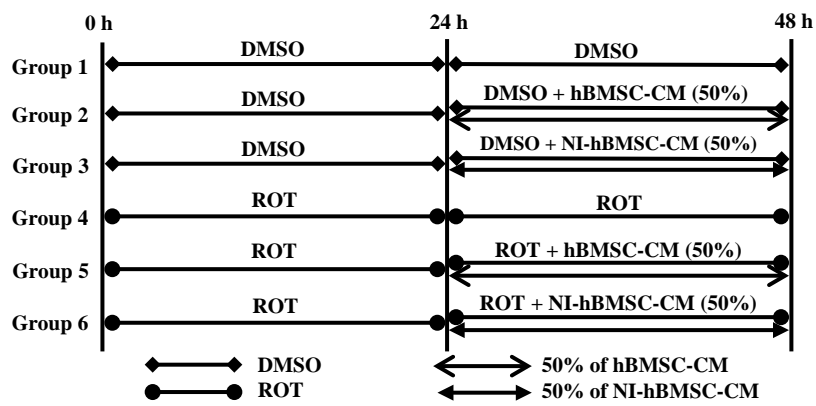

(a)

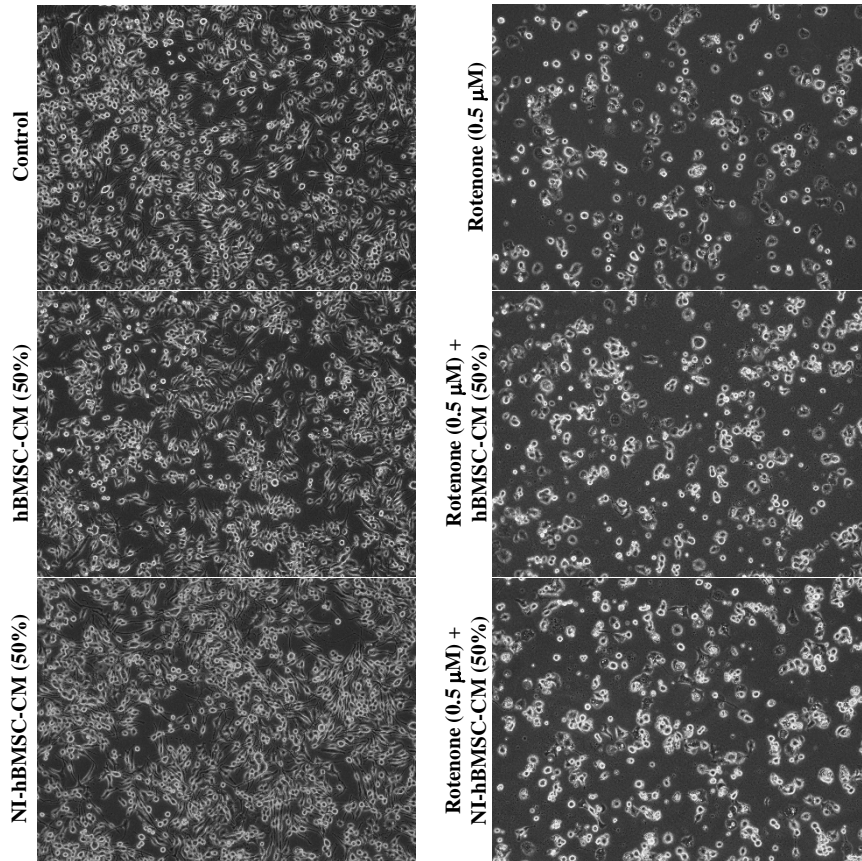

(b)

**SUPPLEMENTARY FIGURE 2:** (a) The experimental study plan. (b) SHSY5Y cells were seeded as  $5 \times 10^4$  cells/ml of DMEM containing 1% FBS and used for experiments after overnight incubation. Cells incubated with the absence or presence of ROT (0.5 μM) for 48 h were treated with hBMSC-CM (50%) or NI-hBMSC-CM (50%) during the last 24 h and assessed for morphological changes. Each picture is representative of three independent experiments.

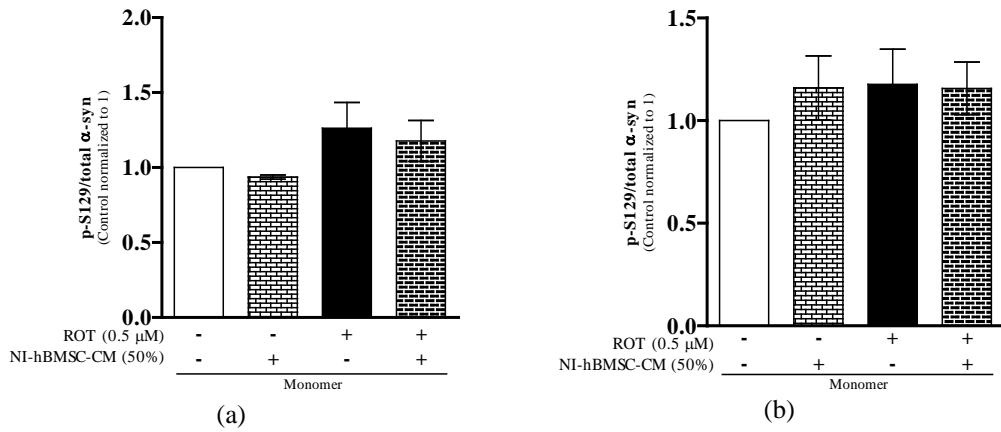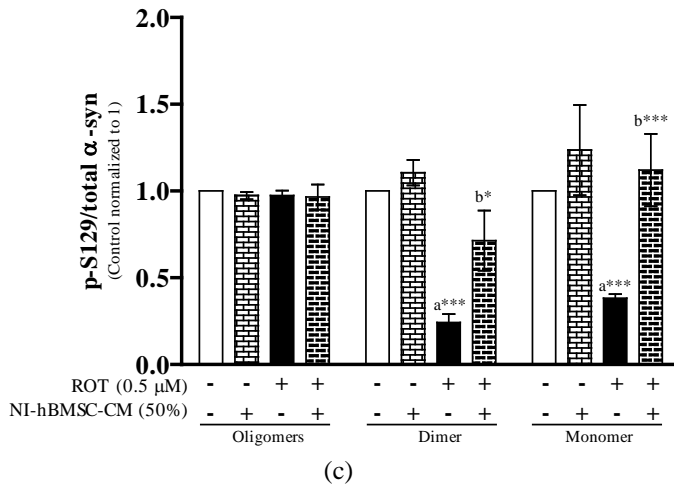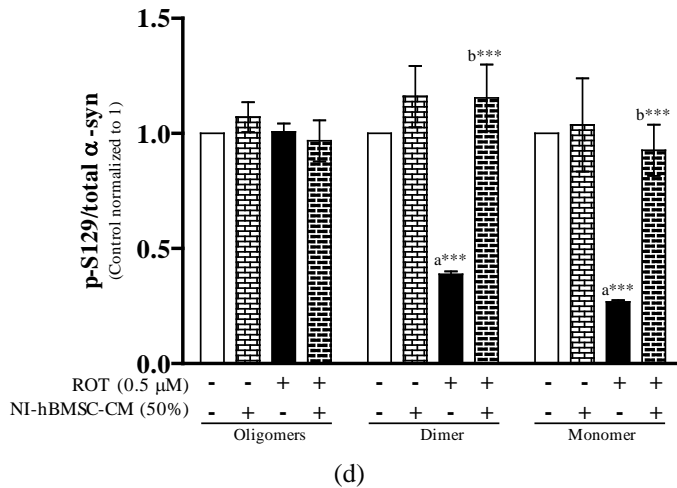

**SUPPLEMENTARY FIGURE 3:** SH-SY5Y cells were seeded as  $5 \times 10^4$  cells/ml of DMEM containing 1% FBS and used for experiments after overnight incubation. Cells with absence or presence of ROT (0.5  $\mu$ M) for 48 h were treated with hBMSC-CM (50%) or NI-hBMSC-CM (50%) during the last 24 h and analyzed by Western blotting. Bar graphs represents fold changes in monomeric p-S129/total  $\alpha$ -syn ratios from SDS-PAGE gels of 12% (a) or 8% (b) in Triton X-100-soluble fraction. The oligomeric, dimeric and monomeric S129/total  $\alpha$ -syn ratios from SDS-PAGE gels of 12% (c) or 8% (d) in Triton X-100-insoluble fraction. Data are mean  $\pm$  SEM of three independent experiments and analyzed by one-way of variance (ANOVA) followed by Tukey's *post hoc* test. Statistical significance: <sup>a</sup>-compared with control; <sup>b</sup>-compared with ROT; \* $p < 0.05$  and \*\*\* $p < 0.001$ .

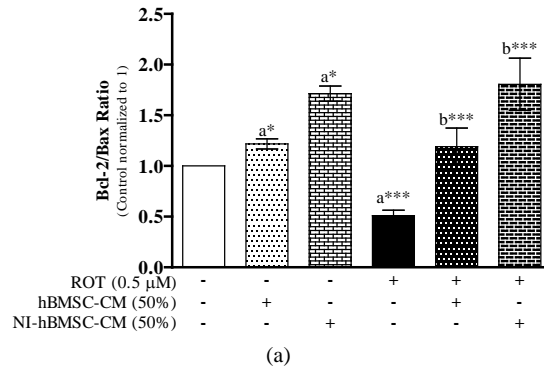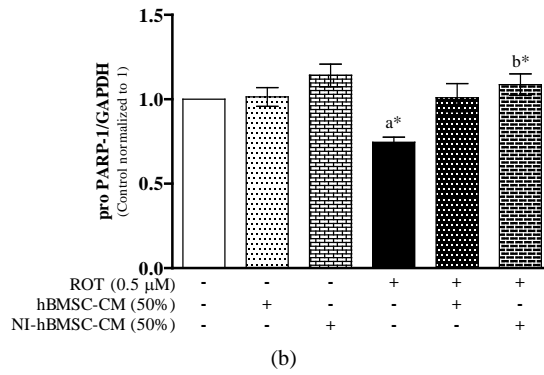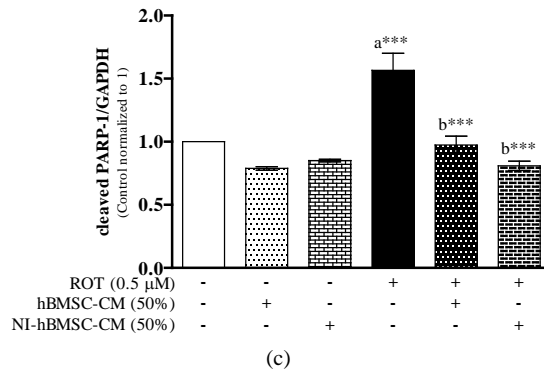

**SUPPLEMENTARY FIGURE 4:** SH-SY5Y cells were seeded as  $5 \times 10^4$  cells/ml of DMEM containing 1% FBS and used for experiments after overnight incubation. Cells with absence or presence of ROT (0.5  $\mu$ M) for 48 h were treated with hBMSC-CM (50%) or NI-hBMSC-CM (50%) during the last 24 h and analyzed by Western blotting. The bar graphs represents for Bax/Bcl-1 ratio (a), pro-PARP-1/GAPDH (b) and cleaved PARP-1/GAPDH ratio (c). Data are mean  $\pm$  SEM of three independent experiments and analyzed by one-way of variance (ANOVA) followed by Tukey's *post hoc* test. Statistical significance: <sup>a</sup>-compared with control; <sup>b</sup>-compared with ROT; \* $p < 0.05$  and \*\*\* $p < 0.001$ .

**SUPPLEMENTARY TABLE 1:** Western blotting conditions and antibodies used in this study.

| Antibody Name                        | Host, MW Details                         | Company        | Cat. No. | Dilution            |
|--------------------------------------|------------------------------------------|----------------|----------|---------------------|
| <b>Primary Antibodies:</b>           |                                          |                |          |                     |
| Tyrosine hydroxylase                 | Rabbit pAb, 62 kDa                       | Millipore      | AB152    | 1:1,000             |
| p-S129 $\alpha$ -synuclein           | Rabbit mAb, 18 kDa                       | Abcam          | ab51253  | 1:1,000             |
| total $\alpha$ -synuclein            | Rabbit mAb, 18 kDa                       | Abcam          | ab212184 | 1:1,000             |
| Neurofilament-H                      | Mouse mAb, 180~200 kDa                   | Cell Signaling | #2836    | 1:1,000             |
| $\beta$ 3-tubulin                    | Rabbit mAb, 55 kDa                       | Cell Signaling | #5568    | 1:1,000             |
| Neuronal Nuclei                      | Mouse mAb, 46~48 kDa                     | Millipore      | MAB377   | 1:1,000             |
| Synaptophysin                        | Mouse mAb, 38~48 kDa                     | Santa Cruz     | sc-17750 | 1:2,000             |
| Bax                                  | Rabbit pAb, 23 kDa                       | Santa Cruz     | sc-493   | 1:500               |
| Bcl-2                                | Rabbit pAb, 26 kDa                       | Santa Cruz     | sc-492   | 1:500               |
| Mcl-1                                | Rabbit mAb, 40 kDa                       | Cell Signaling | #94296   | 1:1,000             |
| Caspase-9                            | Mouse mAb,<br>pro=47, cleaved=37,35 kDa  | Cell Signaling | #9508    | 1:1,000             |
| Caspase-3                            | Rabbit mAb,<br>pro=35, cleaved=17,19 kDa | Cell Signaling | #9665    | 1:1,000             |
| Caspase-7                            | Rabbit mAb,<br>Pro=35, cleaved=20 kDa    | Cell Signaling | #12827   | 1:1,000             |
| PARP                                 | Rabbit pAb,<br>Pro=116, cleaved=89 kDa   | Cell Signaling | #9542    | 1:1,000             |
| GAPDH                                | Rabbit pAb, 37 kDa                       | Santa Cruz     | sc-25778 | 1:2,000             |
| $\beta$ -actin                       | Mouse mAb, 43 kDa                        | Santa Cruz     | sc-47778 | 1:2,000             |
| <b>Secondary Antibodies:</b>         |                                          |                |          |                     |
| Anti-rabbit IgG, HRP-linked antibody |                                          | Cell Signaling | #7074    | 1:1,000<br>~1:2,000 |
| Anti-mouse IgG, HRP-linked antibody  |                                          | Cell Signaling | #7076    | 1:1,000<br>~1:2,000 |

**Western blotting conditions:**

SDS-PAGE Gel Percentages

- 8% = TH, p-S129  $\alpha$ -syn, total  $\alpha$ -syn, NF-H, PARP
- 12% = p-S129  $\alpha$ -syn, total  $\alpha$ -syn,  $\beta$ 3-tubulin, NeuN, SYP
- 13 or 14% = Bax, Bcl-2, Mcl-1, Cas-9, -3, -7.

SDS-PAGE Gel Running:

80~100 V for 100~120 min

SDS-PAGE Gel Transfer Times to Nitrocellulose Membrane:

- 8% = 250 mA for 90 min
- 12% = 200 mA for 65 min
- 13 or 14% = 200 mA for 60 min

For Figure 1(b)

TH (62 kDa) →

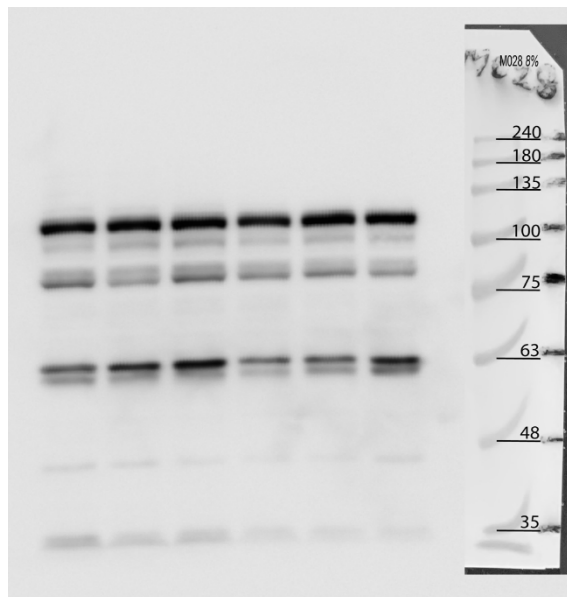

|                   |   |   |   |   |   |   |
|-------------------|---|---|---|---|---|---|
| ROT (0.5 $\mu$ M) | - | - | - | + | + | + |
| hBMSC-CM (50%)    | - | + | - | - | + | - |
| NI-hBMSC-CM (50%) | - | - | + | - | - | + |

GAPDH (37 kDa) →

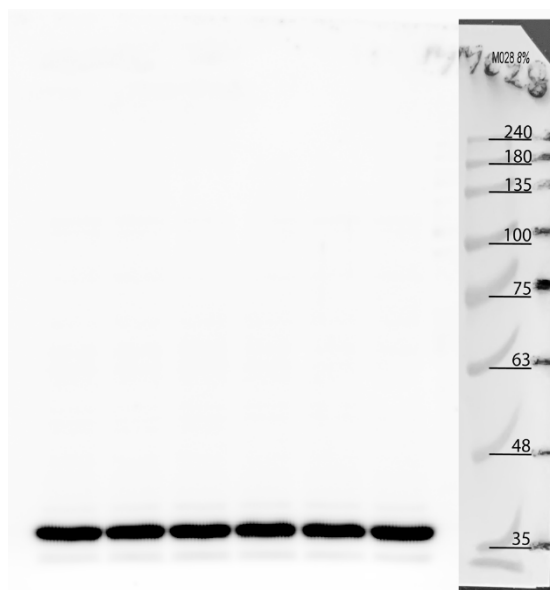

|                   |   |   |   |   |   |   |
|-------------------|---|---|---|---|---|---|
| ROT (0.5 $\mu$ M) | - | - | - | + | + | + |
| hBMSC-CM (50%)    | - | + | - | - | + | - |
| NI-hBMSC-CM (50%) | - | - | + | - | - | + |

**SUPPLEMENTARY FIGURE 5:** Unedited images and their molecular weight markers for respective Western blots used in **FIGURE 1(b)** of this manuscript.

For Figure 2(a)

1% Triton X-100-soluble fraction  
12% SDS-PAGE gel

1% Triton X-100-soluble fraction  
8% SDS-PAGE gel

p-S129  $\alpha$ -syn

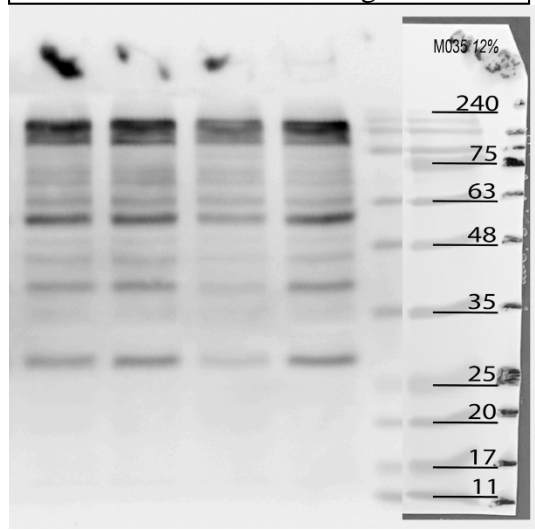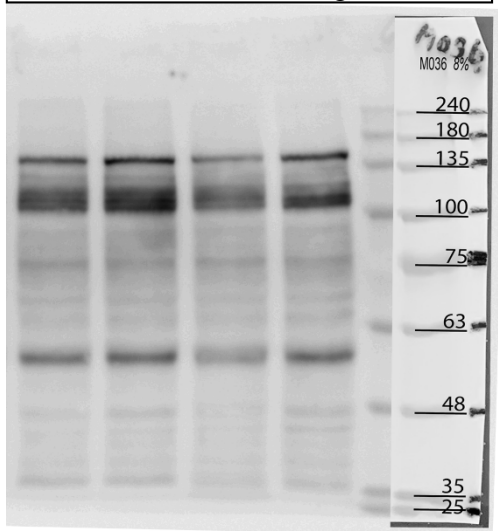

|                                    |   |   |   |   |
|------------------------------------|---|---|---|---|
| <b>ROT (0.5 <math>\mu</math>M)</b> | - | - | + | + |
| <b>NI-hBMSC-CM (50%)</b>           | - | + | - | + |

|   |   |   |   |
|---|---|---|---|
| - | - | + | + |
| - | + | - | + |

total  $\alpha$ -syn

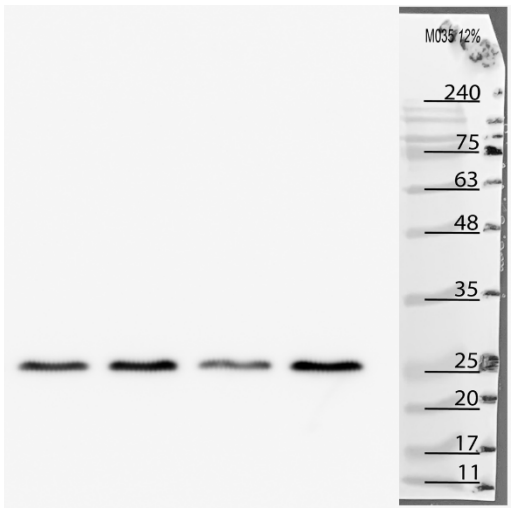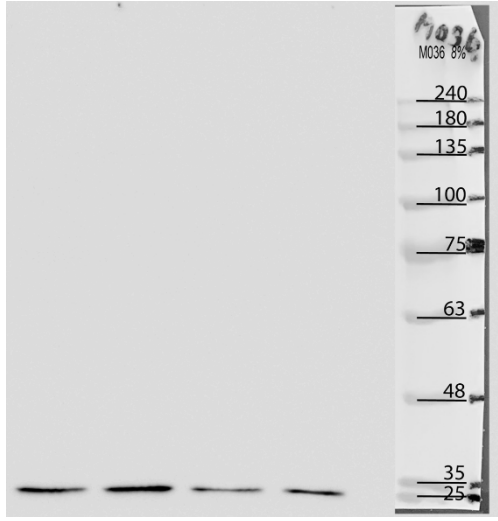

|                                    |   |   |   |   |
|------------------------------------|---|---|---|---|
| <b>ROT (0.5 <math>\mu</math>M)</b> | - | - | + | + |
| <b>NI-hBMSC-CM (50%)</b>           | - | + | - | + |

|   |   |   |   |
|---|---|---|---|
| - | - | + | + |
| - | + | - | + |

GAPDH (37 kDa)

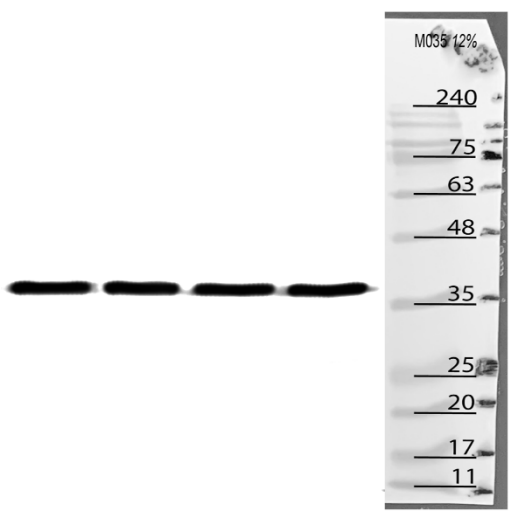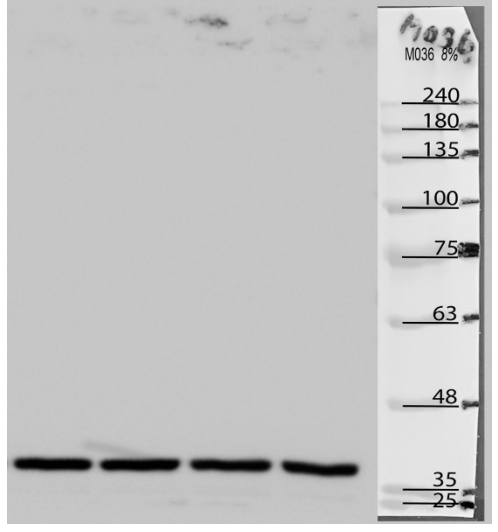

|                                    |   |   |   |   |
|------------------------------------|---|---|---|---|
| <b>ROT (0.5 <math>\mu</math>M)</b> | - | - | + | + |
| <b>NI-hBMSC-CM (50%)</b>           | - | + | - | + |

|   |   |   |   |
|---|---|---|---|
| - | - | + | + |
| - | + | - | + |

**SUPPLEMENTARY FIGURE 6:** Unedited images and their molecular weight markers for respective Western blots used in **FIGURE 2(a)** of this manuscript.

For Figure 3(a)

1% Triton X-100-insoluble fraction  
12% SDS-PAGE gel

1% Triton X-100-insoluble fraction  
8% SDS-PAGE gel

p-S129  $\alpha$ -syn

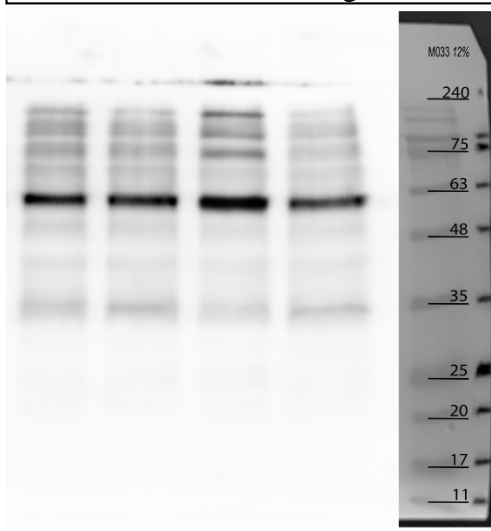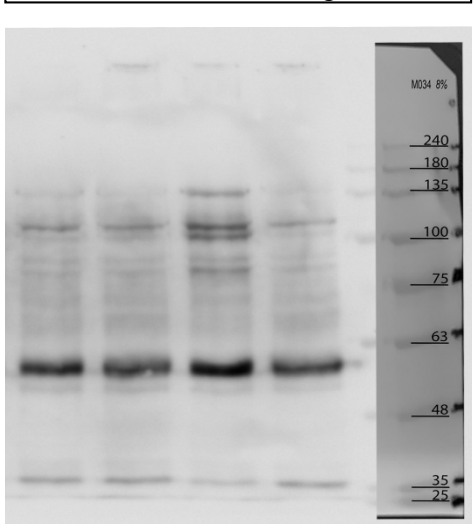

|                                    |   |   |   |   |
|------------------------------------|---|---|---|---|
| <b>ROT (0.5 <math>\mu</math>M)</b> | - | - | + | + |
| <b>NI-hBMSC-CM (50%)</b>           | - | + | - | + |

|   |   |   |   |
|---|---|---|---|
| - | - | + | + |
| - | + | - | + |

total  $\alpha$ -syn

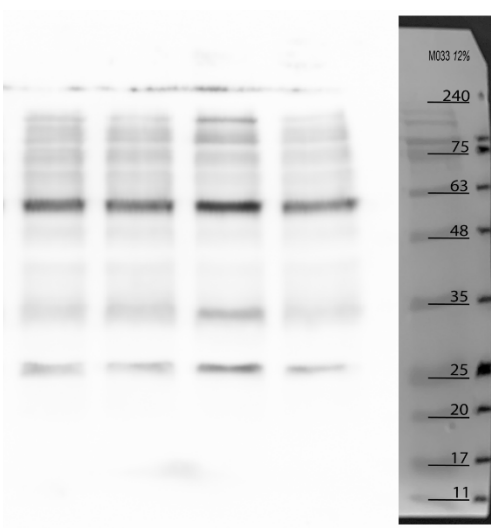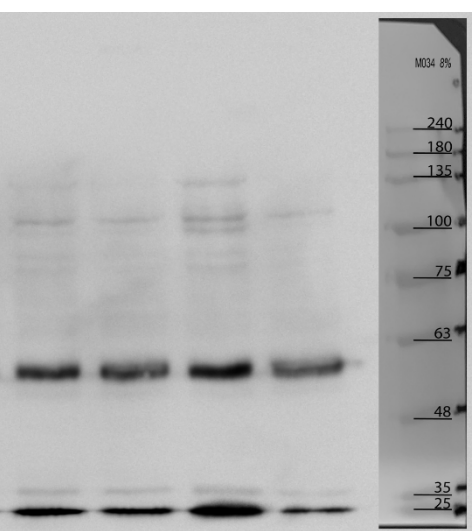

|                                    |   |   |   |   |
|------------------------------------|---|---|---|---|
| <b>ROT (0.5 <math>\mu</math>M)</b> | - | - | + | + |
| <b>NI-hBMSC-CM (50%)</b>           | - | + | - | + |

|   |   |   |   |
|---|---|---|---|
| - | - | + | + |
| - | + | - | + |

GAPDH (37 kDa)

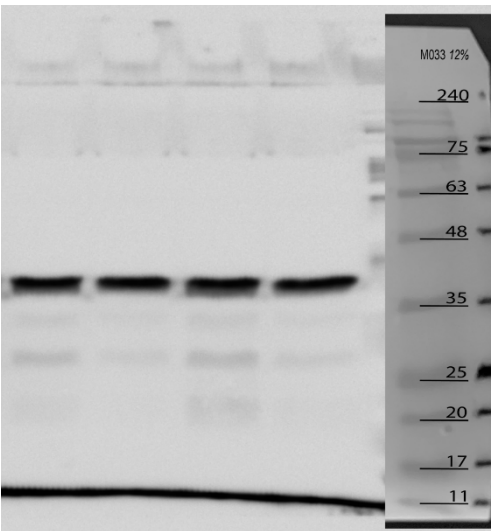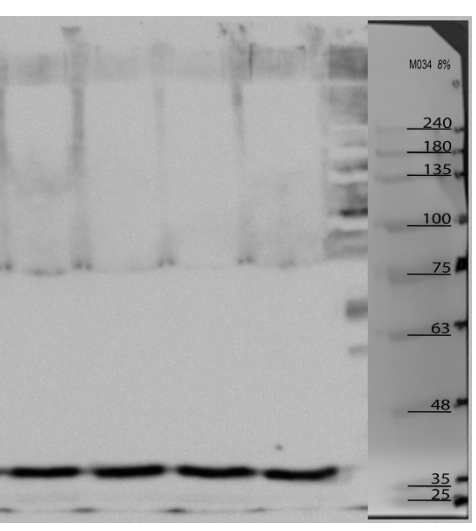

|                                    |   |   |   |   |
|------------------------------------|---|---|---|---|
| <b>ROT (0.5 <math>\mu</math>M)</b> | - | - | + | + |
| <b>NI-hBMSC-CM (50%)</b>           | - | + | - | + |

|   |   |   |   |
|---|---|---|---|
| - | - | + | + |
| - | + | - | + |

**SUPPLEMENTARY FIGURE 7:** Unedited images and their molecular weight markers for respective Western blots used in **FIGURE 3(a)** of this manuscript.



For Figure 4(a)

**NF-H**  
(180~200 kDa) →

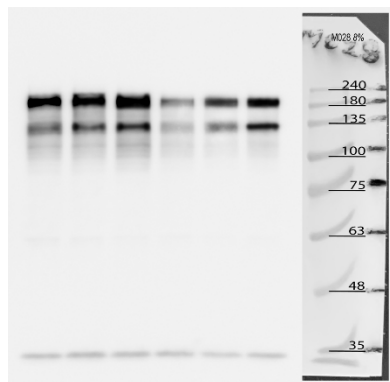

**GAPDH** (37 kDa) →

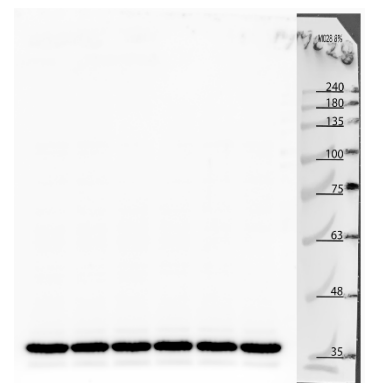

|                   |   |   |   |   |   |   |
|-------------------|---|---|---|---|---|---|
| ROT (0.5 μM)      | - | - | - | + | + | + |
| hBMSC-CM (50%)    | - | + | - | - | + | - |
| NI-hBMSC-CM (50%) | - | - | + | - | - | + |

For Figure 4(b)

**β3-Tubulin**  
(55 kDa) →

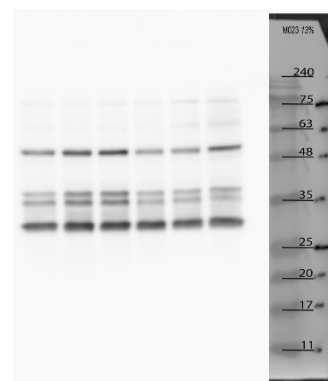

**β-actin** (43 kDa) →

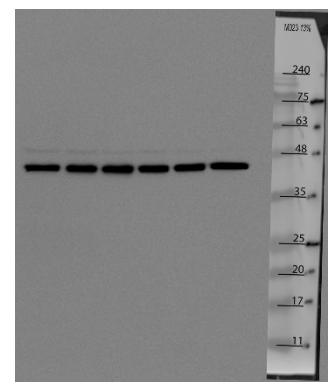

|                   |   |   |   |   |   |   |
|-------------------|---|---|---|---|---|---|
| ROT (0.5 μM)      | - | - | - | + | + | + |
| hBMSC-CM (50%)    | - | + | - | - | + | - |
| NI-hBMSC-CM (50%) | - | - | + | - | - | + |

For Figure 4(c)

**NeuN**  
(46~48 kDa) →

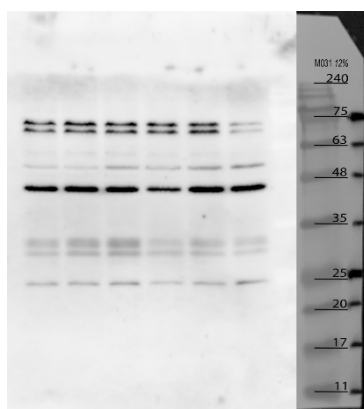

**β-actin** (43 kDa) →

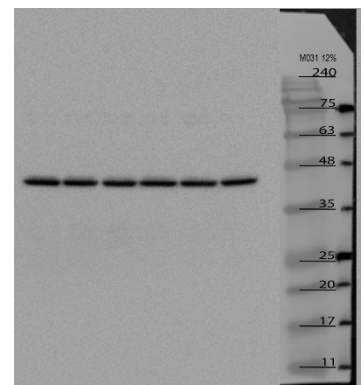

|                   |   |   |   |   |   |   |
|-------------------|---|---|---|---|---|---|
| ROT (0.5 μM)      | - | - | - | + | + | + |
| hBMSC-CM (50%)    | - | + | - | - | + | - |
| NI-hBMSC-CM (50%) | - | - | + | - | - | + |

For Figure 4(d)

**SYP**  
(38~48 kDa) →

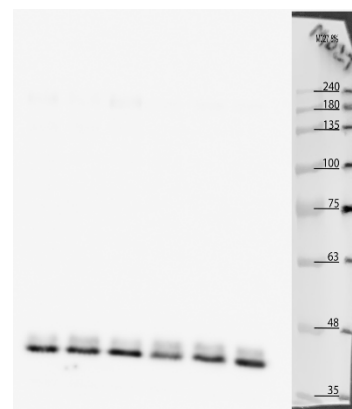

**GAPDH** (37 kDa) →

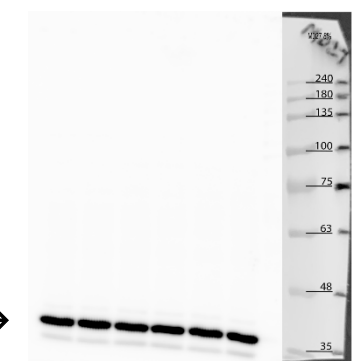

|                   |   |   |   |   |   |   |
|-------------------|---|---|---|---|---|---|
| ROT (0.5 μM)      | - | - | - | + | + | + |
| hBMSC-CM (50%)    | - | + | - | - | + | - |
| NI-hBMSC-CM (50%) | - | - | + | - | - | + |

**SUPPLEMENTARY FIGURE 8:** Unedited images and their molecular weight markers for respective Western blots used in **FIGURE 4** of this manuscript.

For Figure 5(a)

Bax (20 kDa) →

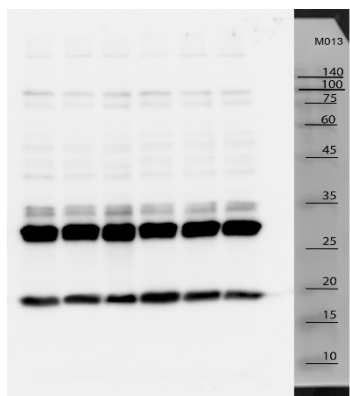

β-actin (43 kDa) →

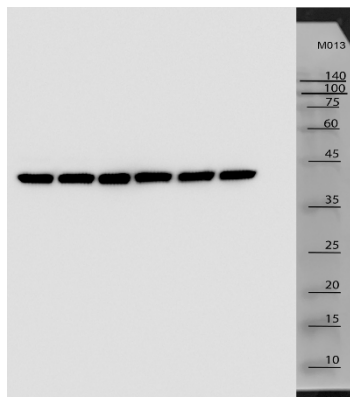

|                   |   |   |   |   |   |   |
|-------------------|---|---|---|---|---|---|
| ROT (0.5 μM)      | - | - | - | + | + | + |
| hBMSC-CM (50%)    | - | + | - | - | + | - |
| NI-hBMSC-CM (50%) | - | - | + | - | - | + |

For Figure 5(b)

Bcl-2 (26 kDa) →

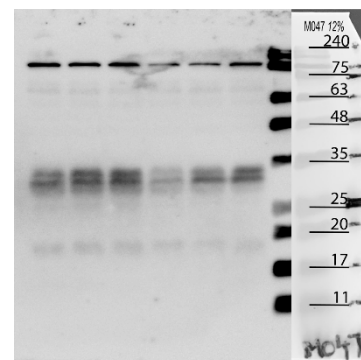

β-actin (43 kDa) →

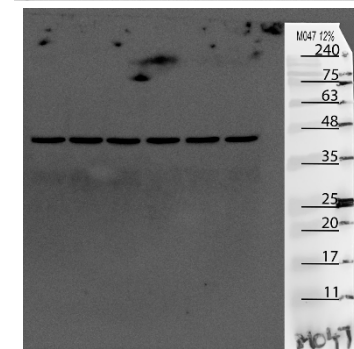

|                   |   |   |   |   |   |   |
|-------------------|---|---|---|---|---|---|
| ROT (0.5 μM)      | - | - | - | + | + | + |
| hBMSC-CM (50%)    | - | + | - | - | + | - |
| NI-hBMSC-CM (50%) | - | - | + | - | - | + |

For Figure 5(d)

Mcl-1 (40 kDa) →

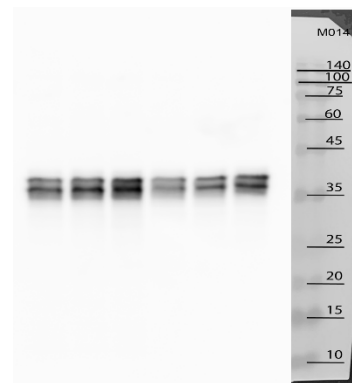

β-actin (43 kDa) →

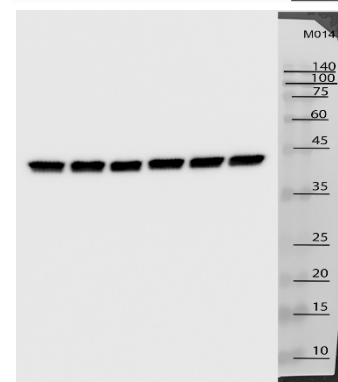

|                   |   |   |   |   |   |   |
|-------------------|---|---|---|---|---|---|
| ROT (0.5 μM)      | - | - | - | + | + | + |
| hBMSC-CM (50%)    | - | + | - | - | + | - |
| NI-hBMSC-CM (50%) | - | - | + | - | - | + |

**SUPPLEMENTARY FIGURE 9:** Unedited images and their molecular weight markers for respective Western blots used in **FIGURE 5** of this manuscript.

For Figure 6(a)

pro-Cas-9  
(49 kDa) →

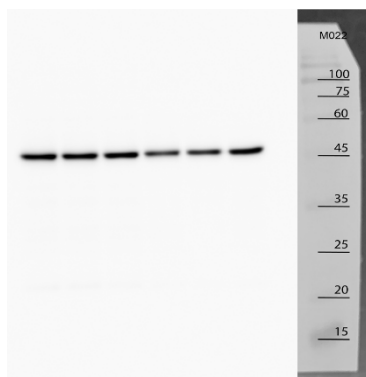

β-actin (43 kDa) →

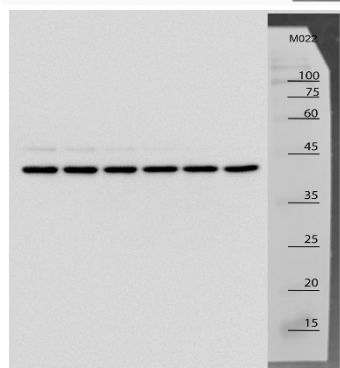

|                   |   |   |   |   |   |   |
|-------------------|---|---|---|---|---|---|
| ROT (0.5 μM)      | - | - | - | + | + | + |
| hBMSC-CM (50%)    | - | + | - | - | + | - |
| NI-hBMSC-CM (50%) | - | - | + | - | - | + |

For Figure 6(b)

pro-Cas-3  
(35 kDa) →

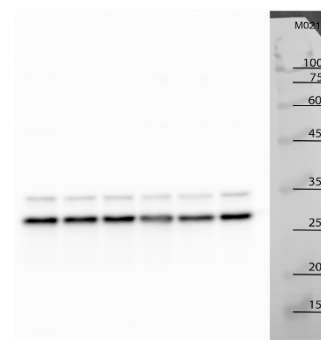

β-actin (43 kDa) →

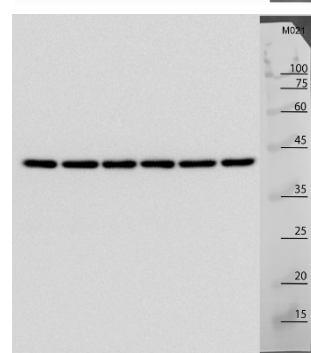

|                   |   |   |   |   |   |   |
|-------------------|---|---|---|---|---|---|
| ROT (0.5 μM)      | - | - | - | + | + | + |
| hBMSC-CM (50%)    | - | + | - | - | + | - |
| NI-hBMSC-CM (50%) | - | - | + | - | - | + |

For Figure 6(c)

pro-Cas-7  
(35 kDa) →

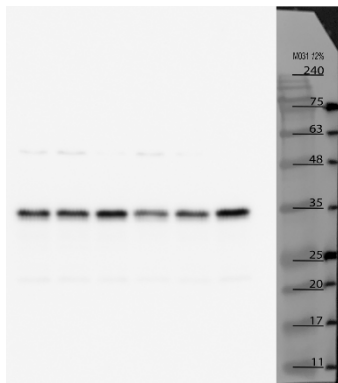

β-actin (43 kDa) →

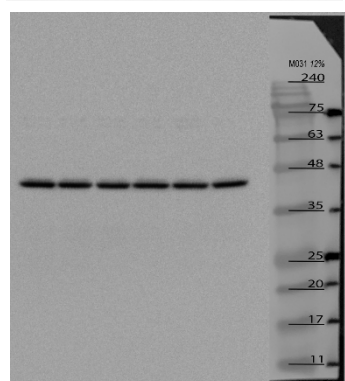

|                   |   |   |   |   |   |   |
|-------------------|---|---|---|---|---|---|
| ROT (0.5 μM)      | - | - | - | + | + | + |
| hBMSC-CM (50%)    | - | + | - | - | + | - |
| NI-hBMSC-CM (50%) | - | - | + | - | - | + |

For Figure 6(d)

pro-PARP (116 kDa) →  
cleaved-PARP (89 kDa) →

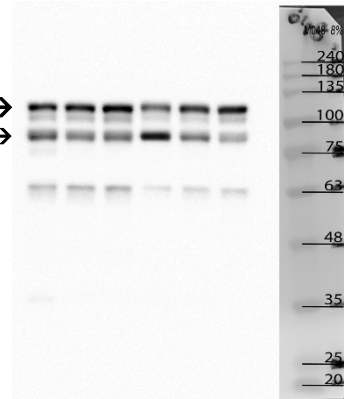

GAPDH (37 kDa) →

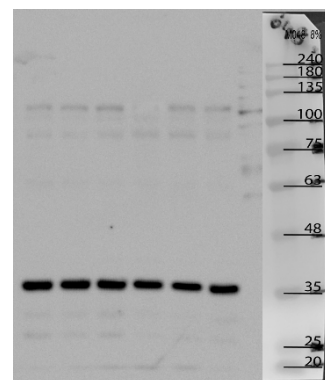

|                   |   |   |   |   |   |   |
|-------------------|---|---|---|---|---|---|
| ROT (0.5 μM)      | - | - | - | + | + | + |
| hBMSC-CM (50%)    | - | + | - | - | + | - |
| NI-hBMSC-CM (50%) | - | - | + | - | - | + |
